# Supplementary material for: Digitaldlsorter: Deep-Learning on scRNA-Seq to Deconvolute Gene Expression Data
Source: PubMed Central journal article supplement (PMC6824295; doi:10.3389/fgene.2019.00978), 2019-10-25
Supplement: DataSheet_1.pdf [file DataSheet_1.pdf]

**Supp Table 1:** Number of Synthetic bulk mixtures generated in each dataset.

| <b>DATASET</b>  | <b>TRAIN</b> | <b>TEST</b> |
|-----------------|--------------|-------------|
| <b>DATASET1</b> | 1000         | 700         |
| <b>DATASET2</b> | 2000         | 1400        |
| <b>DATASET3</b> | 1000         | 350         |
| <b>DATASET4</b> | 3500         | 2700        |
| <b>DATASET5</b> | 3000         | 2000        |

**Supp Table 2:** Grid Search Parameter space. Range of values randomly sampled for each parameter for models generation during grid search analysis.

| <b>PARAMETER</b>            | <b>RANGE</b>                                                                             |
|-----------------------------|------------------------------------------------------------------------------------------|
| <b>LR</b>                   | 0.01-1                                                                                   |
| <b>NEURONS</b>              | 32-256                                                                                   |
| <b>HIDDEN_LAYERS</b>        | 0-2                                                                                      |
| <b>BATCH_SIZE</b>           | 10-500                                                                                   |
| <b>EPOCH</b>                | 10-100                                                                                   |
| <b>DROPOUT</b>              | 0-0.4                                                                                    |
| <b>OPTIMIZER</b>            | adam, nadam                                                                              |
| <b>LOSS</b>                 | mse, mean_absolute_percentage_error,<br>mean_absolute_error, kullback_leibler_divergence |
| <b>ACTIVATION</b>           | relu                                                                                     |
| <b>OUTPUT_ACTIVATION</b>    | softmax                                                                                  |
| <b>KERNEL_INITIALIZER</b>   | normal, uniform                                                                          |
| <b>BATCH_NORMIALIZATION</b> | True, False                                                                              |
| <b>NUMBER OF CLASSES</b>    | 10                                                                                       |

Supp. Figure 1.

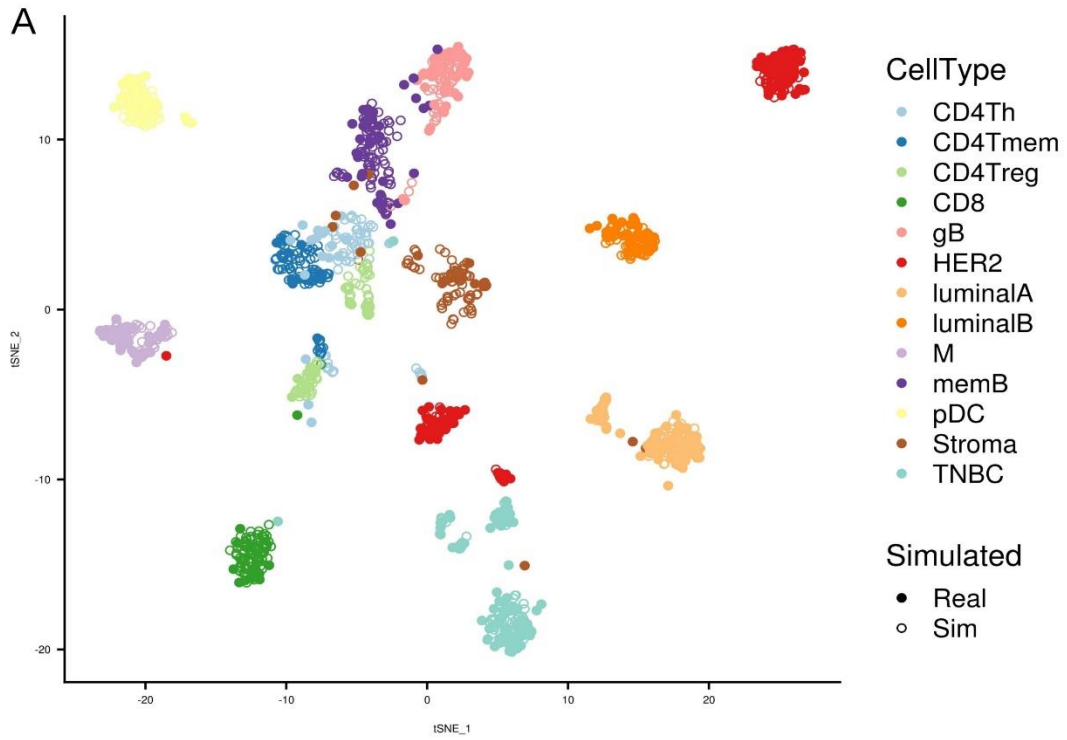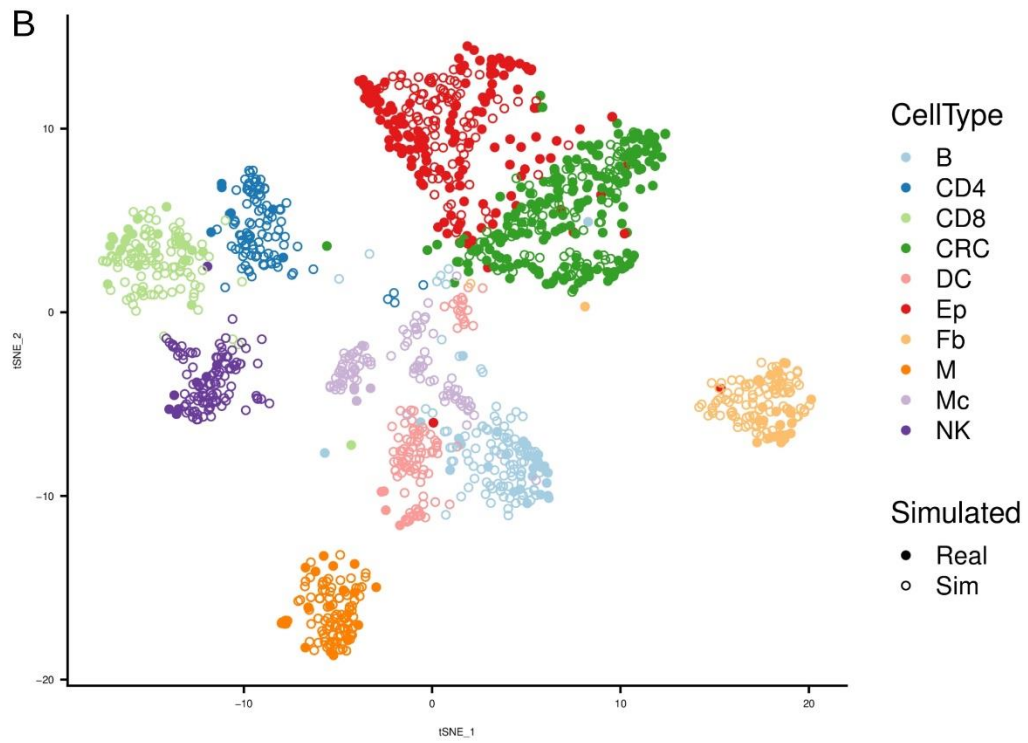



Supp. Figure 3.

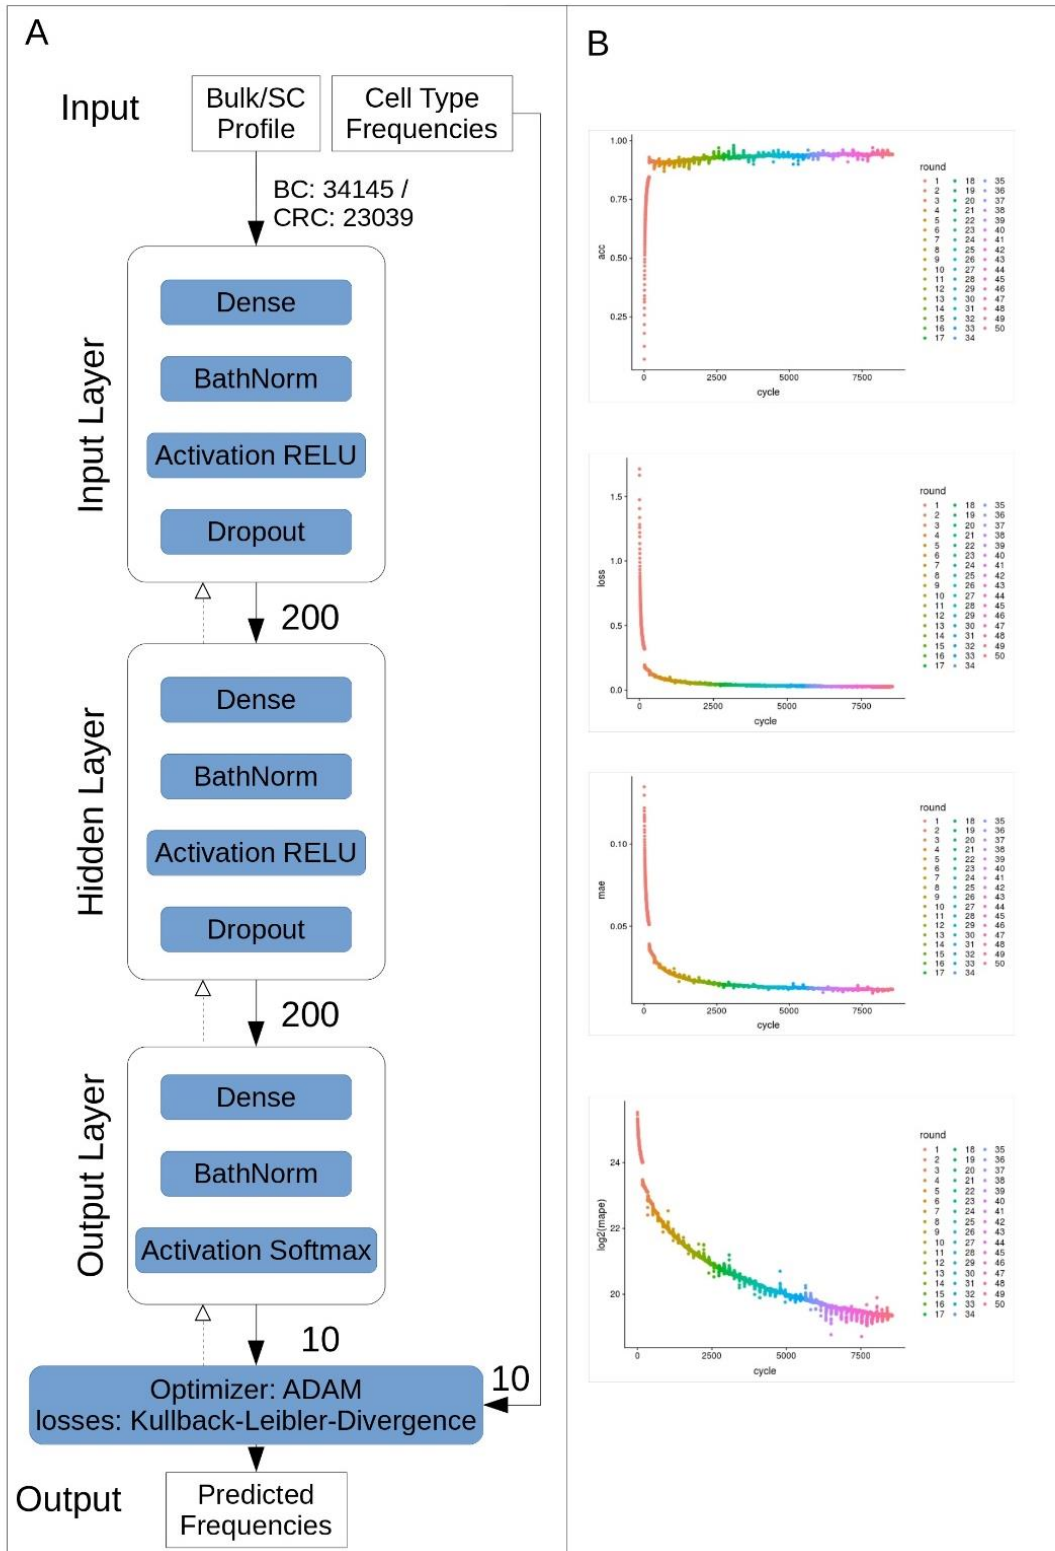

Supp. Figure 4.

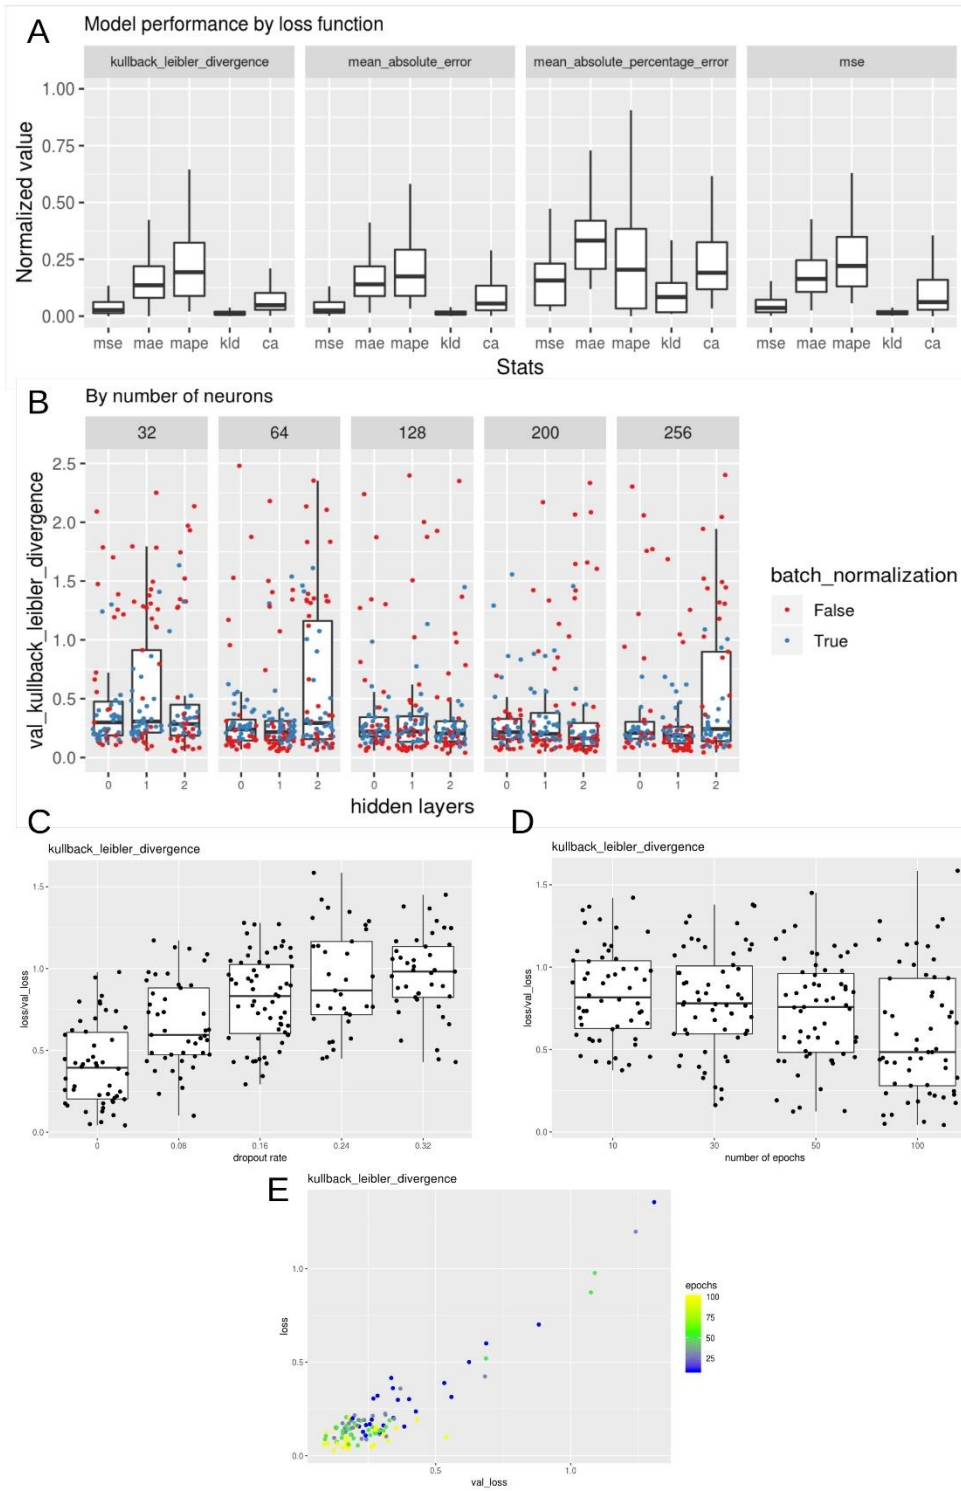







Supp. Figure 7.

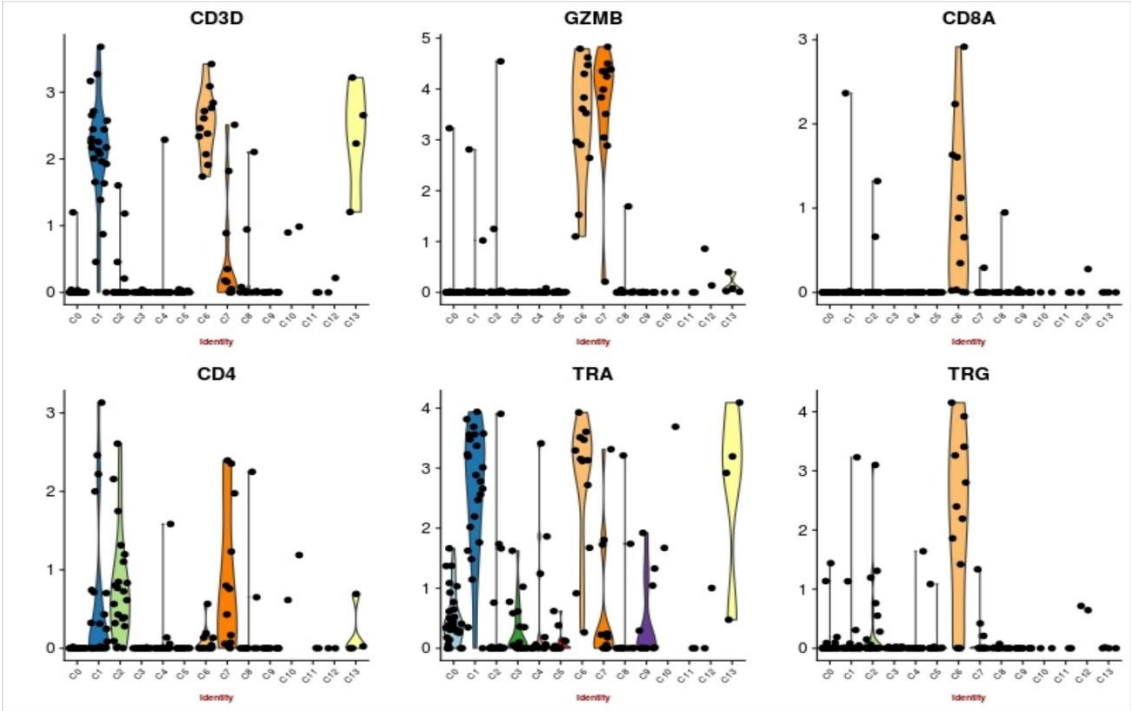



Supp. Figure 8.

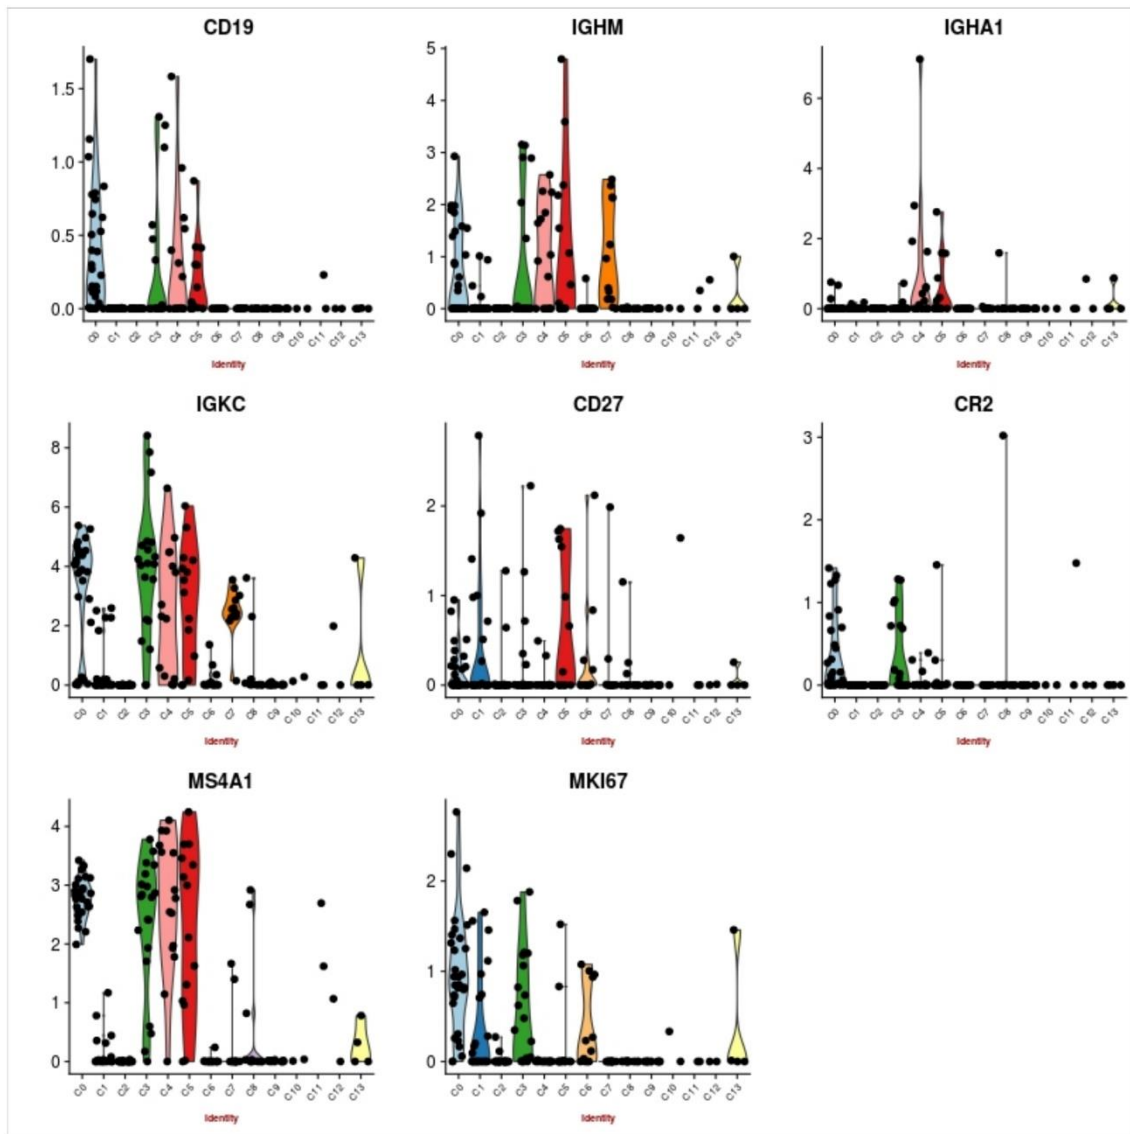

Supp. Figure 9.

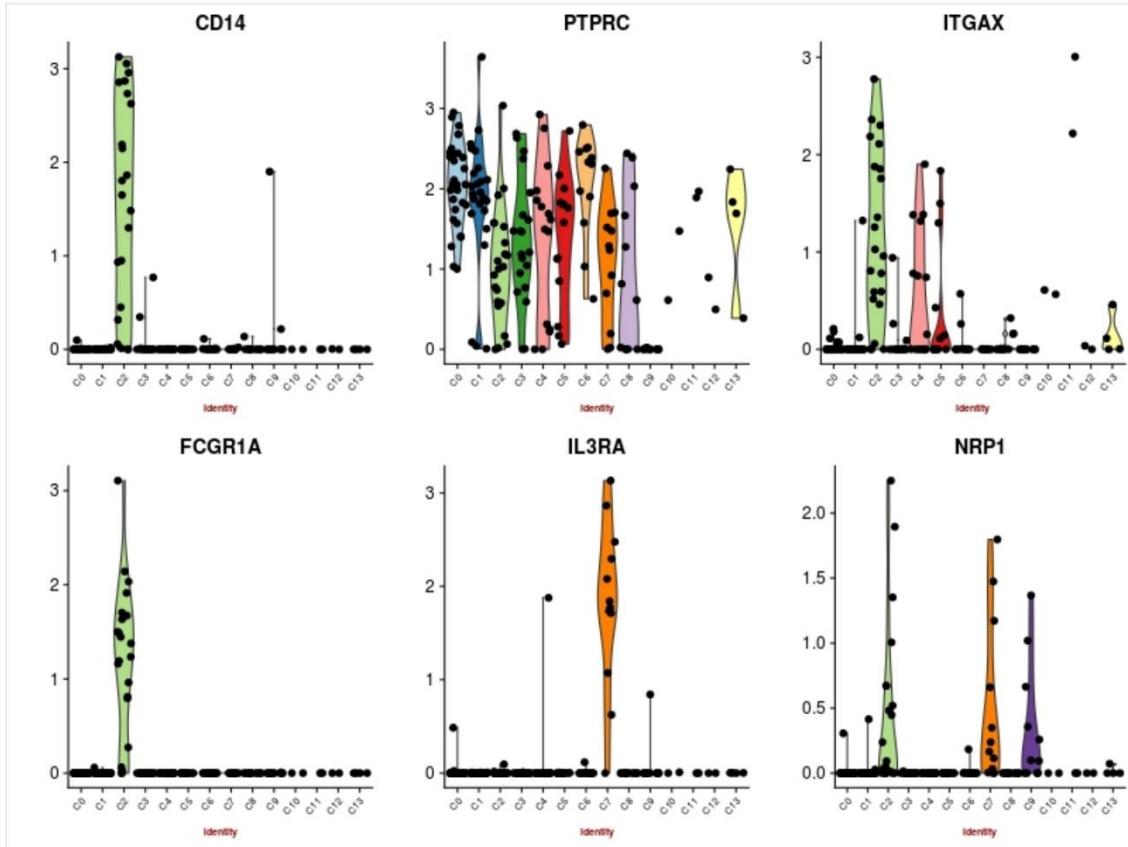

Supp. Figure 10.

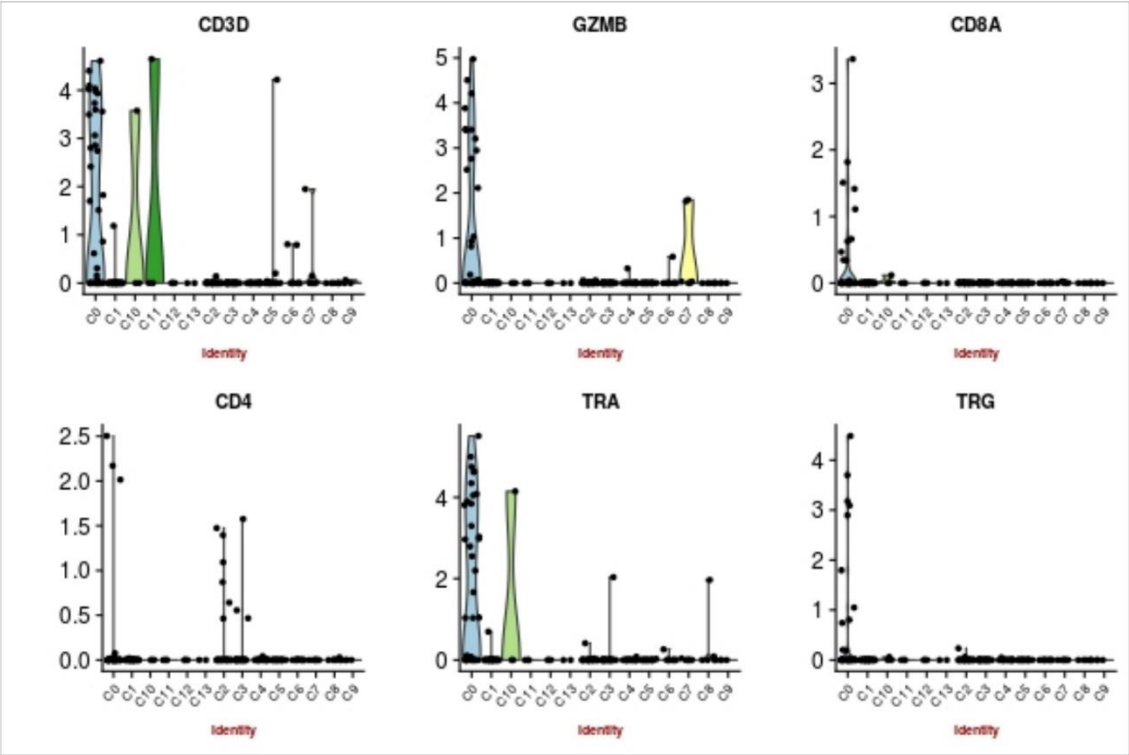

Supp. Figure 11.

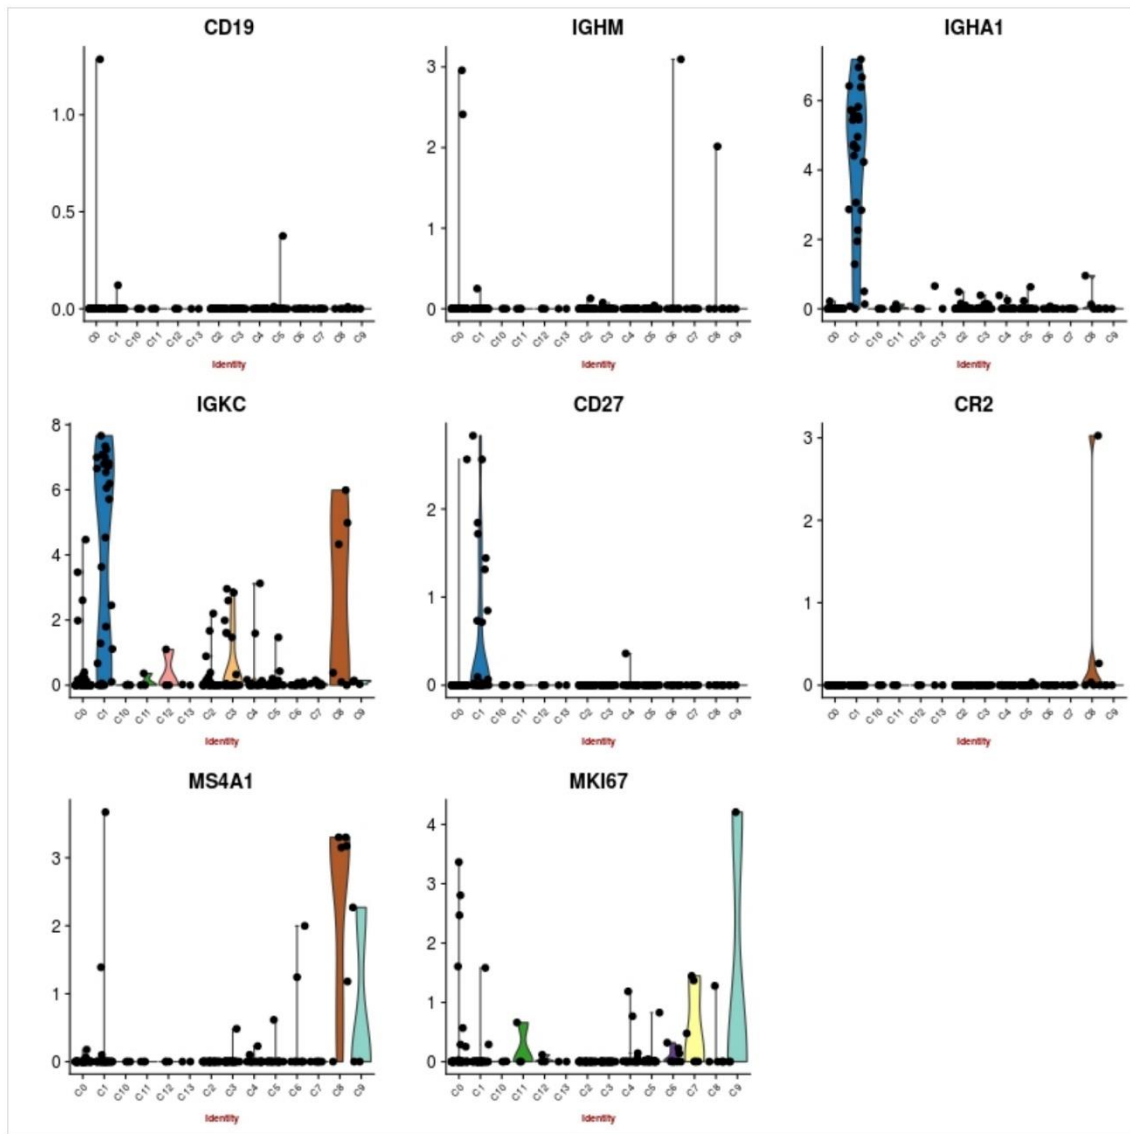

Supp. Figure 12.

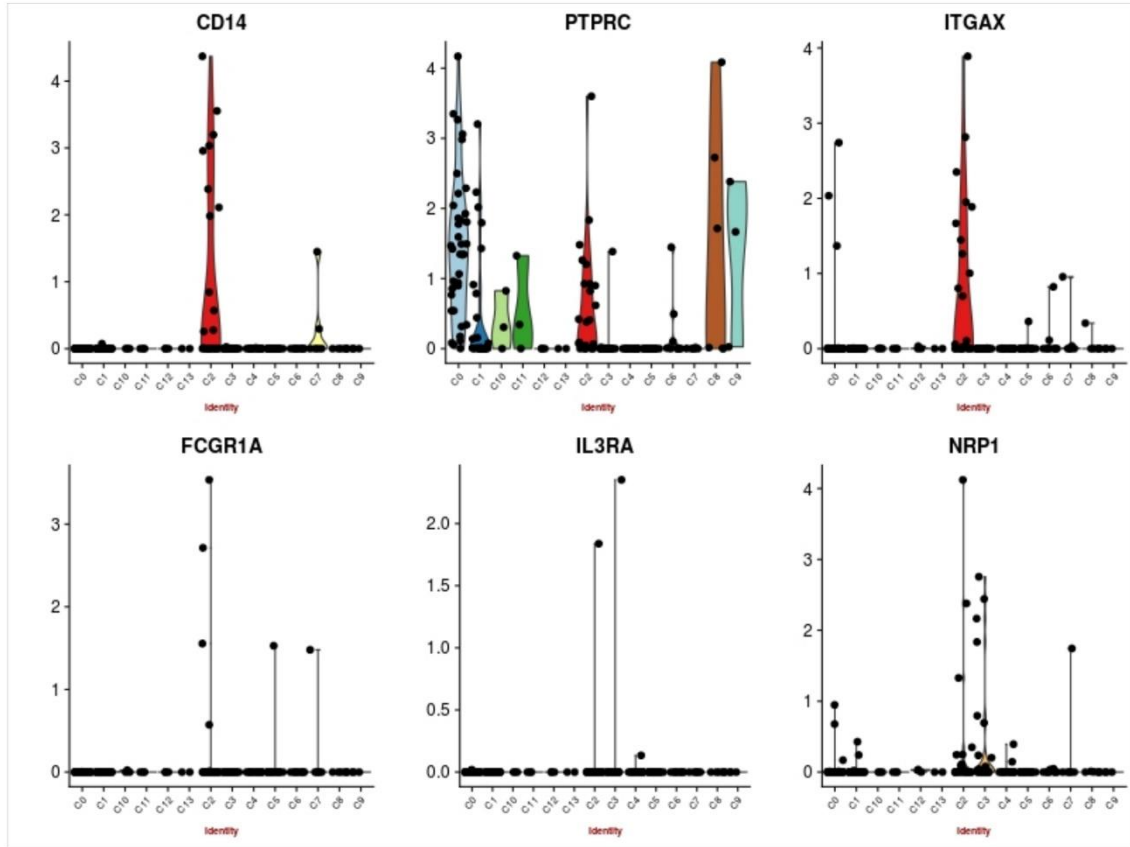



Supp. Figure 13

# BC Experiment

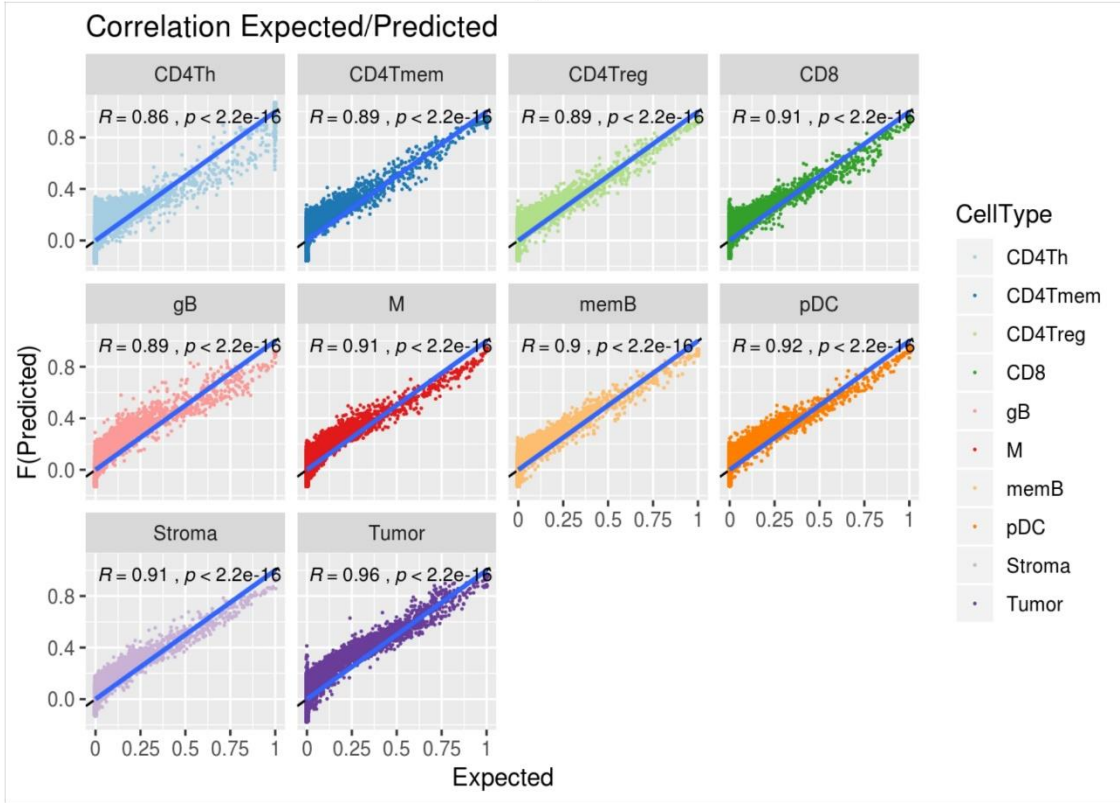

## TCGA BC Samples

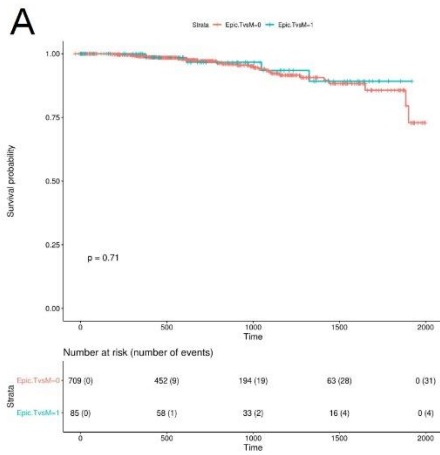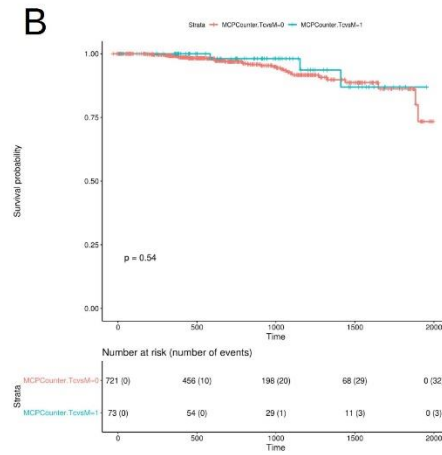

## TCGA CRC Samples

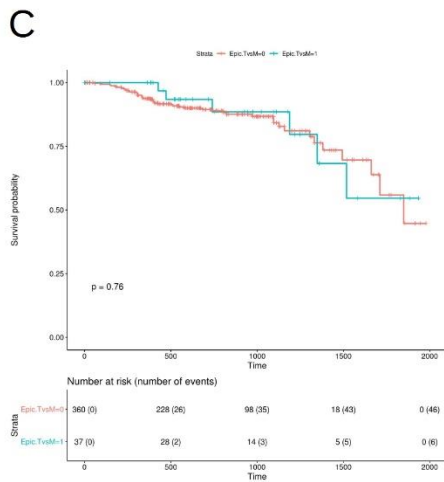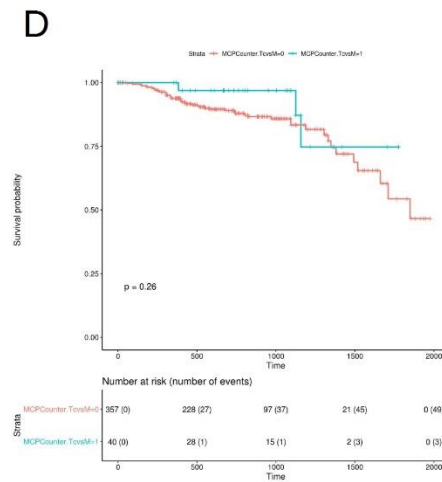

**Supp. Figure 1:** tSNE representation of simulated and real cells from BC **(A)** and CRC **(B)** experiments. Colors indicate cell type. Solid dots label real cell profiles and open dots simulated profiles.

**Supp. Figure 2:** Bulk sample generation. **(A)** Box plots with the frequency distribution of each cell type produced from the different algorithms. Right column represents the frequency distribution of the vectors produced in the sets of the same row ordered from the highest to the lowest frequent in each vector. **(B)** Scheme of the bulk sample generation. For each frequency vector a 100 cells from the training or test set are sampled according to the frequencies and added to produce the bulk profile.

**Supp. Figure 3:** DigitalDLSorter training. **(A)** Scheme of the DNN model trained. **(B)** Progression of accuracy (acc), loss function (loss), Maximum absolute error (mae) and Maximum Absolute Proportional Error ( $\log_2(\text{map})$ ) during the 50 rounds of training process.

**Supp. Figure 4:** Grid Search Parameters. **(A)** Boxplot of normalized validation scores across generated models grouped by loss function. **(B)** Boxplot of Kullback-Liebler Divergence validation metric grouped by number of neurons in the layers. **(C and D)** Boxplot of loss/val\_loss metric grouped by dropout rate **(C)** or number of epochs **(D)**. **(E)** loss versus val\_loss metrics coloured by number of epochs.

**Supp. Figure 5.** Hierarchical clustering heatmap representing the xCell scores (rows) across cells (columns) of the colorectal cancer experiment. Top annotations represents the cluster origin and the final cell type assignment.

**Supp. Figure 6.** Hierarchical clustering heatmap representing the xCell scores (rows) across cells (columns) of the breast cancer experiment. Top annotations represents the cluster origin and the final cell type assignment.

**Supp. Figure 7.** T Cells markers expression across clusters of the breast cancer experiment.

**Supp. Figure 8.** B Cells markers expression across clusters of the breast cancer experiment.

**Supp. Figure 9.** Monocyte Cells markers expression across clusters of the breast cancer experiment

**Supp. Figure 10.** T Cells markers expression across clusters of the colorectal cancer experiment.

**Supp. Figure 11.** B Cells markers expression across clusters of the colorectal cancer experiment

**Supp. Figure 12.** Monocyte Cells markers expression across clusters of the colorectal cancer experiment.

**Supp. Figure 13:** Regression lines of the scaled square root of the predicted vs real proportions grouped by cell type.

**Supp. Figure 14:** Kaplan-Meier overall survival curves from breast **(A and B)** and colorectal **(C and D)** cancer patients using estimations from EPIC **(A and C)** and MCPCounter **(B and D)**. In blue, samples within the highest 90<sup>th</sup> quantile of the ratio between T cells (CD8\_TCells for EPIC, T\_Cytotoxic\_Cells for

MPCCounter) over Monocytes/Macrophages (Macrophages for EPIC, Monocytic Lineage for MPCCounter). In red, individuals with low Tcells/Mono ratio.
